# Supplementary material
Source: PubMed Central journal article supplement (PMC6716372)
Supplement: NIHMS1039232-supplement-suppl.pdf [file NIHMS1039232-supplement-suppl.pdf]

**Online Figure I legends****Detection of MMP-2 and MMP-9 gelatinolytic activity in WT and MMP-9<sup>-/-</sup> tissue**

**homogenates.** Top panels illustrate representative SDS-PAGE gelatin zymography obtained from the non-ischemic (Day 0) or ischemic ( Day 1, 3, 7, and 14) adductor muscle tissue homogenates. The same MMP standards (“Std”) were used for the separate quantification of lytic bands associated with the latent (pro-) or activated forms of MMP-2 and MMP-9 in all animals (n=4 for each point), as presented in the graphs. A significant induction of MMP-9 was noted early after onset of ischemia in the WT muscle tissue (\* p<0.05 vs. 0 day time point). Western blotting (middle panels) was used to confirm MMP-9 protein expression in WT tissue, respectively lack of it in the MMP-9<sup>-/-</sup> tissue. No compensatory increase in the MMP-2 was observed in the MMP-9<sup>-/-</sup> tissue lysates.

**Online Figure II**

**Detection of Flk-1 and alpha-smooth actin as an indication for the presence of endothelial cell precursors and respectively pericytes in the non-ischemic and ischemic WT and MMP-9<sup>-/-</sup> tissue.** Positive staining (arrows) for alpha-actin was detected around capillaries, consistent with the perivascular location of pericytes. Similar patterns (see insets) and densities were detected in the WT and MMP-9<sup>-/-</sup> tissue sections. Levels of FLK-1 staining were too low to allow conclusive discrimination between various specimens.

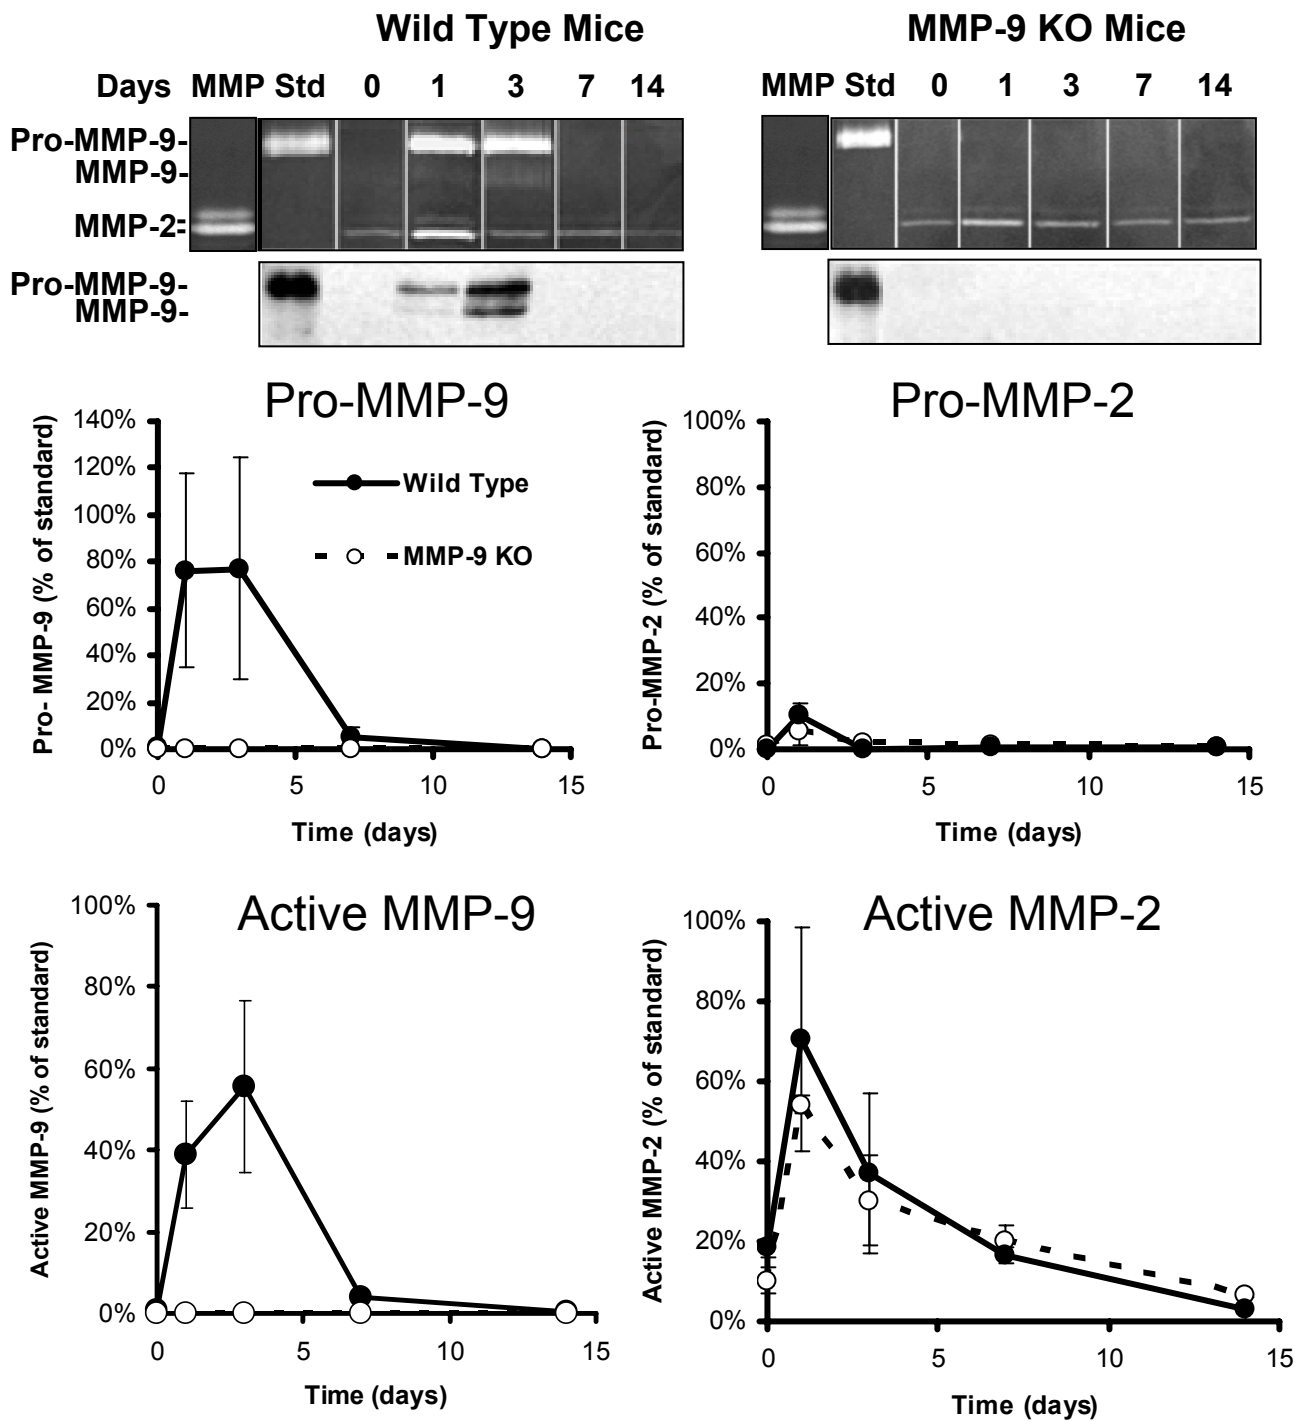

Online Figure I  
Johnson et al (6215R1)

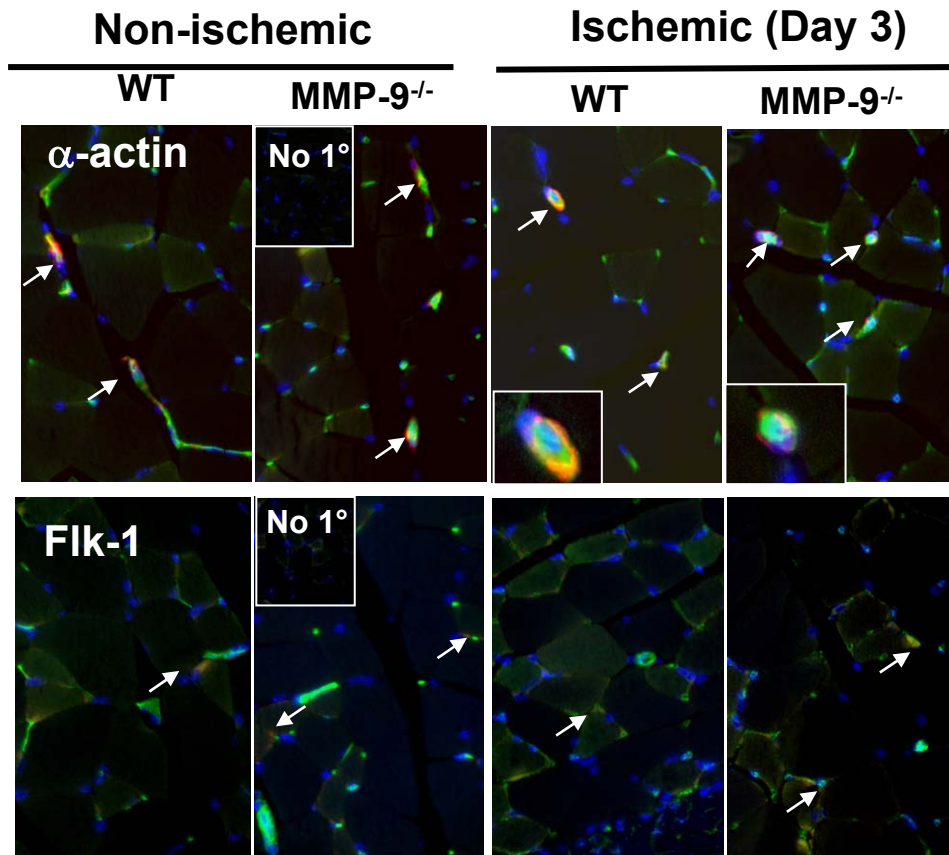

Online Figure II  
Johnson et al (6215R1)
